# Supplementary material
Source: ML conference proceedings conference paper supplement (https://proceedings.neurips.cc/paper_files/paper/2023/hash/32c2f3e0a44d55820da7fbcee0a1d95c-Abstract.html)
Supplement: Supplementary file 1 [file 32c2f3e0a44d55820da7fbcee0a1d95c-Supplemental-Conference.pdf]

# Appendix

## A Design of LSH Functions:

In practice, we could realize  $d(x, y)$  with cosine similarity for dense vectors. In this case, the LSH function family  $\mathcal{H}$  should have the following form.

**Definition A.1** (Sign Random Projection (SRP) Hash [56]). *We define a function family  $\mathcal{H}$  as follow: Given a vectors  $x \in \mathbb{R}^d$ , any  $h : \mathbb{R}^d \rightarrow \{0, 1\}$  that is in the family  $\mathcal{H}$ , we have*

$$h(x) = \text{sign}(Ax),$$

where  $A \in \mathbb{R}^{d \times 1}$  is a random matrix that every entry of  $A$  is sampled from normal distribution  $\mathcal{N}(0, 1)$ ,  $\text{sign}$  is the sign function that set positive value to 1 and others to 0. Moreover, for two vectors  $x, y \in \mathbb{R}^d$  we have

$$\Pr[h(x) = h(y)] = 1 - \pi^{-1} \arccos \frac{x^\top y}{\|x\|_2 \|y\|_2}.$$

As shown in Definition A.1, the SRP hash is an LSH function built upon random Gaussian projections, which is a fundamental technique in ML [57, 58, 59, 60]. If two vectors are close in terms of cosine similarity, their collision probability would also be high.

The SRP hash is usually designed for dense vectors. If both  $x \in \{0, 1\}^d$  and  $y \in \{0, 1\}^d$  are high dimensional binary vectors with large  $d$ . Their Jaccard similarity [61] is also an important measure for search [62, 63, 64] and learning tasks [65, 66]. There also exists a family of LSH functions for Jaccard similarity. We define this LSH function as:

**Definition A.2** (MinHash [67]). *A function family  $\mathcal{H}$  is a MinHash family if for any  $h \in \mathcal{H}$ , given a vectors  $x \in \{0, 1\}^d$ , we have*

$$h(x) = \arg \min(\Pi(x))$$

where  $\Pi$  is a permutation function on the binary vector  $x$ . The  $\arg \min$  operation takes the index of the first non-zero value in  $\Pi(x)$ . Moreover, given two binary vectors  $x, y \in \{0, 1\}^d$ , we have

$$\Pr[h(x) = h(y)] = \frac{\sum_{i=1}^d \min(x_i, y_i)}{\sum_{i=1}^d \max(x_i, y_i)},$$

where the right term represents the Jaccard similarity of binary vectors  $x$  and  $y$ .

Following Definition A.2, MinHash serves as a powerful tool for Jaccard similarity estimation [68, 69, 70]. We will use both SRP hash and MinHash in the following section to build a sketch for data distribution.

In this paper, we take a kernel view of the collision probability of LSH (see Definition 3.2). This view aligns with a series of research in efficient kernel decomposition [71, 72, 73], kernel density estimation [34] and kernel learning [74].

## B More Algorithms

In this section, we introduce the client selection algorithm with our one-pass sketch.

---

**Algorithm 3** Client Selection with Distribution Sketch

---

**Input:** Clients  $\mathcal{C} = \{c_1, \dots, c_n\}$ , Number of rounds  $T$ , Step size  $\eta$ , LSH function family  $\mathcal{H}$ , Hash range  $B$ , Rows  $R$ , Number of active clients  $L$ , Number of Selected Clients  $K$ , Epochs  $E$ , Random Seed  $s$   
**Output:** Global model  $w^T$ .  
**Initialize:** Global model  $w^1$ , global sketch  $S_g$ , random seed  $s$ .  
**for**  $c \in \mathcal{C}$  **do**  
    Get client data  $\mathcal{D}_c$  from client  $c$ .  
    Compute sketch  $S_c$  using Algorithm 1 with parameter  $\mathcal{D}_c, \mathcal{H}, B, R$  and  $s$ .  
    Send  $S_c$  to server  
     $S_g \leftarrow S_g + S_c$   
**end for**  
 $S_g \leftarrow S_g/n$  ▷ Generate global sketch on server  
**for**  $i \in [T]$  **do**  
     $L$  clients  $\{c_1, \dots, c_L\} \subset \mathcal{C}$  are activated at random.  
    **for**  $j \in [L]$  **do**  
         $p_j = 1/\|S_g - S_j\|_2$  ▷  $S_j$  is the sketch for client  $c_j$   
    **end for**  
    **for**  $j \in [L]$  **do**  
         $p_j = \frac{\exp p_j}{\sum_{l=1}^L \exp p_l}$   
    **end for**  
    Sample  $K$  clients out of  $\{c_1, \dots, c_L\}$  without replacement, client  $c_j$  is selected with probability  $p_j$ .  
    Server send  $w^i$  to the selected clients.  
    Each selected client  $c_k$  updates  $w^i$  to  $w_k^i$  by training on its data for  $E$  epochs with step size  $\eta$ .  
    Each selected client sends  $w_k^i$  back to the server.  
     $w^{i+1} = \sum_{k=1}^K w_k^i$   
**end for**  
**return**  $w^T$

---

## 631 C Discussion

632 **Limitations.** To make the sketching process faster and more efficient, we need a powerful GPU for  
633 performing matrix multiplication. However, we still need to work on developing a hardware-friendly  
634 implementation for sketching in the future.

635 **Potential Negative Societal Impacts.** Our work assesses how different the data is among clients  
636 without sharing the data. While the calculations are fast, they could still release carbon emissions,  
637 particularly when using GPUs as hardware.

## 638 D Proofs

639 To formally prove the Theorems in the paper. We start with introducing a query algorithm to the  
640 one-pass distribution sketch.

641 Next, we introduce the formal statements in the paper as below.

**Theorem D.1** (Formal version of Theorem 3.3). *Let  $P(x)$  denote a probability density function. Let  $\mathcal{D} \sim_{\text{iid}} P(x)$  denote a dataset. Let  $k(x, y)$  be an LSH kernel (see Definition 3.2). Let  $S$  define the function implemented by Algorithm 0. We show that*

$$S(x) \xrightarrow[\text{i.p.}]{\frac{1}{N}} \sum_{x_i \in \mathcal{D}} k(x_i, x)$$

642 with convergence rate  $O(\sqrt{\log R}/\sqrt{R})$ .

---

**Algorithm 4** Query to the Distribution Sketch
 

---

**Input:** Query  $q \in \mathbb{R}^d$ , LSH functions  $h_1, \dots, h_R$ , Dataset  $\mathcal{D}$ , Sketch  $S \in \mathbb{R}^{R \times B}$  built on  $\mathcal{D}$  with Algorithm 1  
**Output:**  $S(q) \in \mathbb{R}$   
**Initialize:**  $S(q) \leftarrow 0$   
 $A \leftarrow \emptyset$   
**for**  $i = 1 \rightarrow R$  **do**  
      $A \leftarrow A \cup \{S_{i, h_i(q)}\}$   
**end for**  
 $S(q) \leftarrow \text{median}(A)$   
**return**  $S(q)$

---

*Proof.* Let  $\kappa(x) = \sum_{x_i \in \mathcal{D}} \sqrt{k(x, x_i)}$  be the (non-normalized) kernel density estimate. Theorem 3.4 of [75] provides the following inequality for any  $\delta$ , where  $\tilde{\kappa}(x) = \sum_{x_i \in \mathcal{D}} \sqrt{k(x, x_i)}$ :

$$\Pr \left[ |NS(x) - \kappa(x)| > \left( 32 \frac{\tilde{\kappa}^2(x)}{R} \log 1/\delta \right)^{1/2} \right] < \delta$$

This is equivalent to the following inequality, which we can obtain by dividing both sides of the inequality inside the probability by  $N$ .

$$\Pr \left[ \left| S(x) - \frac{1}{N} \kappa(x) \right| > \left( 32 \frac{\tilde{\kappa}^2(x)}{N^2 R} \log 1/\delta \right)^{1/2} \right] < \delta$$

We want to show that the error  $|S(x) - \frac{1}{N} \kappa(x)|$  converges in probability to zero, because this directly proves the main claim of the theorem. To do this, we must show that for any  $\Delta > 0$ ,

$$\lim_{R \rightarrow \infty} \Pr \left[ \left| S(x) - \frac{1}{N} \kappa(x) \right| > \Delta \right] = 0$$

This can be done by setting  $\delta = \frac{1}{R}$ , which yields the following inequality:

$$\Pr \left[ \left| S(x) - \frac{1}{N} \kappa(x) \right| > \left( 32 \frac{\tilde{\kappa}^2(x)}{N^2 R} \log R \right)^{1/2} \right] < \frac{1}{R}$$

Because  $\tilde{\kappa} < N$ , the following (simpler, but somewhat looser) inequality also holds:

$$\Pr \left[ \left| S(x) - \frac{1}{N} \kappa(x) \right| > \left( 32 \frac{\log R}{R} \right)^{1/2} \right] < \frac{1}{R}$$

643 This implies that  $S(x) \xrightarrow{\text{i.p.}} \frac{1}{N} \kappa(x)$  by considering  $R$  large enough that  $\sqrt{\log R/R} < \Delta$ .  $\square$

**Theorem D.2** (Formal version of Theorem 3.4). *Let  $S$  be an  $\epsilon$ -differentially private distribution sketch of a dataset  $\mathcal{D} = \{x_1, \dots, x_N\}$  with  $\mathcal{D} \stackrel{\text{iid}}{\sim} P(x)$  and let  $k(x, y)$  be an LSH kernel (see Definition 3.2). Let  $S$  define the function implemented by Algorithm 0. Then*

$$S(x) \xrightarrow{\text{i.p.}} \frac{1}{N} \sum_{x_i \in \mathcal{D}} k(x_i, x)$$

644 with convergence rate  $O(\sqrt{\log R/R} + \sqrt{R \log R}/(N\epsilon))$  when  $R = \omega(1)$  (e.g.  $R = \log N$ ).

*Proof.* As before, let  $\kappa(x) = \sum_{x_i \in \mathcal{D}} \sqrt{k(x, x_i)}$  be the (non-normalized) kernel density estimate and let  $\tilde{\kappa}(x) = \sum_{x_i \in \mathcal{D}} \sqrt{k(x, x_i)}$ . For the  $\epsilon$ -differentially private version of the algorithm, Theorem 3.4 of [75] provides the following inequality for any  $\delta > 0$ .

$$\Pr \left[ |NS(x) - \kappa(x)| > \left( \left( \frac{\tilde{\kappa}^2(x)}{R} + 2 \frac{R}{\epsilon^2} \right) 32 \log 1/\delta \right)^{1/2} \right] < \delta$$

Again, we divide both sides of the inner inequality by  $N$ , and we also loosen (and simplify) the inequality with the observation that  $\tilde{\kappa}(x)/N < 1$ .

$$\Pr \left[ \left| S(x) - \frac{1}{N} \kappa(x) \right| > \left( \left( \frac{1}{R} + 2 \frac{R}{N^2 \epsilon^2} \right) 32 \log 1/\delta \right)^{1/2} \right] < \delta$$

We want to show that the error  $|S(x) - \frac{1}{N} \kappa(x)|$  converges in probability to zero, because this directly proves the main claim of the theorem. To do this, we must show that for any  $\Delta > 0$ ,

$$\lim_{R \rightarrow \infty} \Pr \left[ \left| S(x) - \frac{1}{N} \kappa(x) \right| > \Delta \right] = 0$$

As before, we choose  $\delta = \frac{1}{R}$ , which yields the following inequality:

$$\Pr \left[ \left| S(x) - \frac{1}{N} \kappa(x) \right| > \left( \left( \frac{1}{R} + 2 \frac{R}{N^2 \epsilon^2} \right) 32 \log R \right)^{1/2} \right] < \frac{1}{R}$$

This is the same as:

$$\Pr \left[ \left| S(x) - \frac{1}{N} \kappa(x) \right| > \left( 32 \frac{\log R}{R} + 64 \frac{R}{N^2 \epsilon^2} \log R \right)^{1/2} \right] < \frac{1}{R}$$

Here, we will loosen the inequality again (also for the sake of presentation). Because  $\sqrt{a+b} \leq \sqrt{a} + \sqrt{b}$ , the following inequality is also satisfied:

$$\Pr \left[ \left| S(x) - \frac{1}{N} \kappa(x) \right| > 4\sqrt{2} \sqrt{\frac{\log R}{R}} + 8 \frac{\sqrt{R \log R}}{N \epsilon} \right] < \frac{1}{R}$$

Here, the convergence rate is  $O(\sqrt{\log R/R} + \sqrt{R \log R}/(N \epsilon))$ . For us to have the error converge in probability to zero, we need for

$$\sqrt{\frac{\log R}{R}} + \sqrt{2} \frac{\sqrt{R \log R}}{N \epsilon} \rightarrow 0$$

645 as  $N \rightarrow \infty$ . A simple way to achieve this is for  $R$  to be weakly dependent on  $N$  (i.e. choose  
646  $R = \omega(1)$ ). For example, choosing  $R = \log N$  satisfies the conditions.  $\square$
